# Supplementary material
Source: Springer Nature journal article supplement (https://www.springermedizin.de/resource/supplementary/13026_2008_25_MOESM4_ESM.pdf/9644480)
Supplement: MOESM4 [file 9644480]

# Drugs Ordered

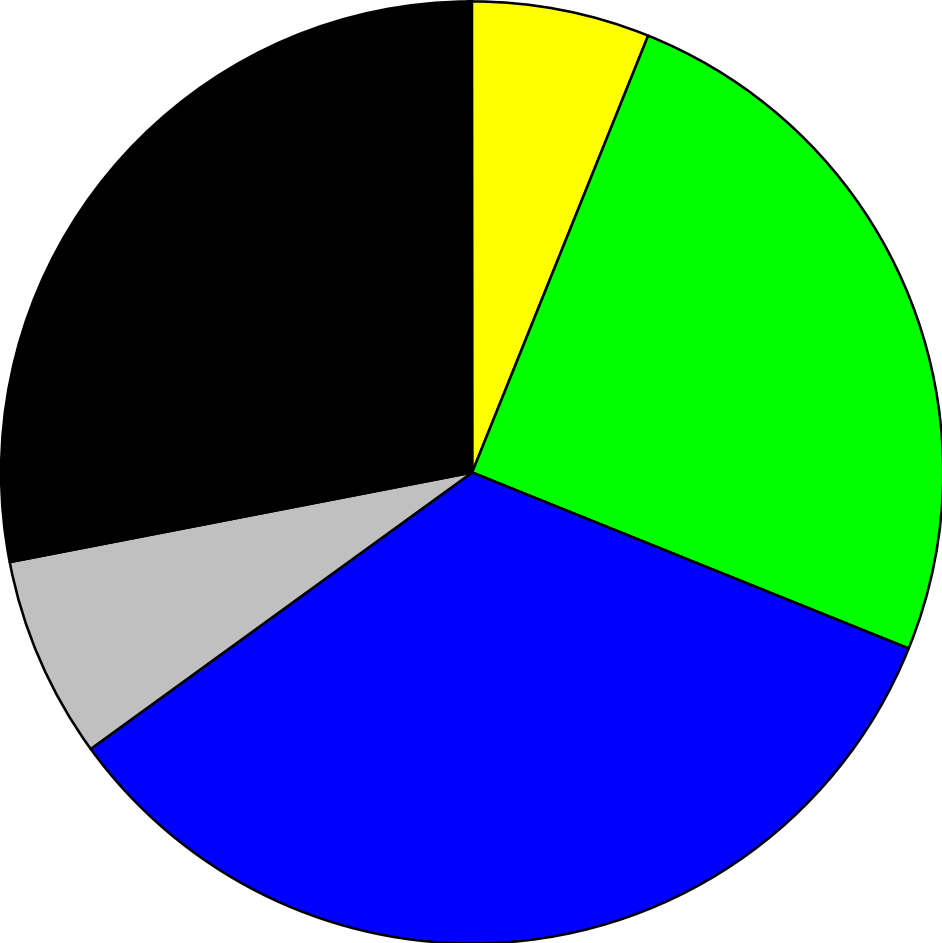

- Non-Narcotic Analgesics
- Narcotic Analgesics
- NSAIDs (Including Antiarthritics)
- Other Drugs
- None
